# Supplementary material for: Hospitalisation trends in India from serial cross-sectional nationwide surveys: 1995 to 2014
Source: PubMed Central journal article supplement (PMC5770834; doi:10.1136/bmjopen-2016-014188), 2017-12-19
Supplement: bmjopen-2016-014188supp001.pdf [file bmjopen-2016-014188supp001.pdf]

**Table S1** Percent distribution of missing and deceased samples in NSS 1995–1996, NSS 2004 and NSS 2014, India

| Background characteristics                                      | NSS 1995–1996 |      | NSS 2004 |      | NSS 2014 |      |
|-----------------------------------------------------------------|---------------|------|----------|------|----------|------|
|                                                                 | N             | %    | N        | %    | N        | %    |
| All ages                                                        |               |      |          |      |          |      |
| Age                                                             | 55            | 0.00 | 38       | 0.01 | 0        | 0.00 |
| Sex                                                             | 2             | 0.00 | 0        | 0.00 | 0        | 0.00 |
| Place of residence                                              | 0             | 0.00 | 0        | 0.00 | 0        | 0.00 |
| States                                                          | 0             | 0.00 | 0        | 0.00 | 0        | 0.00 |
| Economic status                                                 | 0             | 0.00 | 0        | 0.00 | 0        | 0.00 |
| N (including deceased persons)                                  | 633 405       |      | 385 055  |      | 335 499  |      |
| 60 years or more                                                |               |      |          |      |          |      |
| Marital status                                                  | 27            | 0.12 | 0        | 0.00 | 0        | 0.00 |
| Caste                                                           | 21            | 0.05 | 9        | 0.01 | 0        | 0.00 |
| Education                                                       | 41            | 0.12 | 16       | 0.04 | 0        | 0.00 |
| Economic dependency                                             | 780           | 2.29 | 602      | 1.45 | 11       | 0.01 |
| Living arrangement                                              | 334           | 0.85 | 727      | 1.72 | 0        | 0.00 |
| Physical mobility status                                        | 658           | 1.93 | 786      | 1.93 | 11       | 0.01 |
| Self-rated health (SRH)                                         | 510           | 1.52 | 1,650    | 3.95 | 11       | 0.01 |
| SRH compared to previous year                                   | 542           | 1.58 | 1,650    | 3.94 | 11       | 0.01 |
| N (excluding deceased persons)                                  | 33 990        |      | 34 831   |      | 27 245   |      |
| % of hospitalised persons who died in 365 days reference period | 1284          | 3.05 | 736      | 2.32 | 1152     | 2.18 |
| N (including deceased persons)                                  | 35 274        |      | 35 567   |      | 28 397   |      |

NSS, National Sample Survey; Caste in India is a social stratification of communities into 4 groups, namely scheduled castes (SCs), scheduled tribes (STs), other backward castes, and other castes. SC/STs are officially designated disadvantaged groups in India.
