# Supplementary material for: Hospitalisation trends in India from serial cross-sectional nationwide surveys: 1995 to 2014
Source: PubMed Central journal article supplement (PMC5770834; doi:10.1136/bmjopen-2016-014188), 2017-12-19
Supplement: bmjopen-2016-014188supp002.pdf [file bmjopen-2016-014188supp002.pdf]

**Table S2** List of diseases grouped according to Global Burden of Disease (GBD) study categorisation of diseases, 2013

|                                                                   |                                                        |
|-------------------------------------------------------------------|--------------------------------------------------------|
| Communicable diseases and nutritional disorders (CDs)             | Non-communicable diseases and injuries (NCDs)          |
| Tuberculosis                                                      | Neoplasms                                              |
| STDs including HIV/AIDs                                           | ○ Cancer and other tumours                             |
| Diarrhoeal diseases                                               | Cardiovascular and circulatory diseases                |
| ○ Cholera                                                         | ○ Heart disease, Hypertension                          |
| ○ Diarrhoea/dysentery/gastro-enteritis                            | ○ Rheumatic fever                                      |
| ○ Amoebiasis                                                      | Chronic respiratory diseases                           |
| Respiratory infections and other common infectious disease        | ○ Bronchial Asthma and related conditions              |
| ○ Dengue/Influenza                                                | Digestive diseases                                     |
| ○ Pneumonia                                                       | ○ Gastrointestinal bleeding/piles                      |
| ○ Respiratory (including ear/nose/throat) ailments                | ○ Gastritis/gastric/peptic ulcer                       |
| ○ Cough and acute bronchitis                                      | ○ Cirrhosis/hydrocele                                  |
| ○ Pleurisy                                                        | ○ Food poisoning                                       |
| ○ Meningitis and viral encephalitis                               | Neurological disorder:                                 |
| ○ Diphtheria                                                      | ○ Cerebral stroke                                      |
| ○ Pertussis/whooping cough                                        | ○ Other diseases of nerves                             |
| ○ Tetanus                                                         | ○ Epilepsy/headache                                    |
| ○ Measles/chicken pox/mumps/eruptive                              | ○ Nervous and general debility                         |
| Neglected tropical diseases and malaria                           | ○ Cerebral haemorrhage, thrombosis                     |
| ○ Filariasis                                                      | Mental and behavioural disorders                       |
| ○ Trachoma                                                        | Diabetes, urogenital, blood and endocrine diseases     |
| ○ Worm infestation/Guinea worm                                    | ○ Diabetes                                             |
| ○ Leprosy                                                         | ○ Disease of kidney/urinary system/prostrate disorders |
| Neonatal and maternal disorders                                   | ○ Gynaecological disorders                             |
| Nutritional deficiencies:                                         | ○ Goiter/Thyroid disorders                             |
| ○ Anemia/bleeding disorders                                       | Musculoskeletal disorders                              |
| ○ Under-nutrition                                                 | ○ Disorders of joints and bones                        |
| ○ Scurvy                                                          | ○ Locomotor disability                                 |
| ○ Other malnutrition diseases (Beri-Beri , Ricket)                | Other non-communicable diseases                        |
| Other communicable diseases and nutrition disorders:              | Skin and subcutaneous diseases                         |
| ○ Hepatitis/Jaundice/diseases of liver                            | Sense organ diseases                                   |
| ○ Fever of unknown origin/fever of short duration/malaria/typhoid | ○ Glucoma                                              |
|                                                                   | ○ Cataracts                                            |
|                                                                   | ○ Hearing loss, adult onset                            |
|                                                                   | ○ Vision disorders, age related                        |
|                                                                   | ○ Diseases of ear/nose/throat                          |
|                                                                   | ○ Speech disability                                    |
|                                                                   | Oral disorders                                         |
|                                                                   | Accidents/injury/burns/fractures/poisoning             |
|                                                                   | Congenital anomalies                                   |
