# Supplementary material for: Hospitalisation trends in India from serial cross-sectional nationwide surveys: 1995 to 2014
Source: PubMed Central journal article supplement (PMC5770834; doi:10.1136/bmjopen-2016-014188), 2017-12-19
Supplement: bmjopen-2016-014188supp003.pdf [file bmjopen-2016-014188supp003.pdf]

**Table S3** Hospitalisation rates per 1000 (95% CI) for the older population by disease groups in the major states in NSS 1995–1996, NSS 2004 and NSS 2014, India

| States          | Hospitalisation rates per 1000 (95% CI) |                        |                        |                        |                        |                       |                          |                         |                        |
|-----------------|-----------------------------------------|------------------------|------------------------|------------------------|------------------------|-----------------------|--------------------------|-------------------------|------------------------|
|                 | NSS 1995–1996                           |                        |                        | NSS 2004               |                        |                       | NSS 2014                 |                         |                        |
|                 | All diseases                            | NCDs                   | CDs                    | All diseases           | NCDs                   | CDs                   | All diseases             | NCDs                    | CDs                    |
| Less developed  | 25.1<br>(22.3 to 27.9)                  | 13.6<br>(12.1 to 15.1) | 5.8<br>(4.0 to 7.6)    | 41.6<br>(38.4 to 44.9) | 28.6<br>(25.8 to 31.4) | 7.3<br>(6.2 to 8.4)   | 78.4<br>(71.3 to 85.5)   | 61.2<br>(54.6 to 67.8)  | 15.0<br>(12.7 to 17.2) |
| Assam           | 28.9<br>(20.4 to 37.3)                  | 16.3<br>(10.1 to 22.4) | 6.2<br>(2.2 to 10.2)   | 35.7<br>(24.0 to 47.5) | 26.6<br>(15.4 to 37.7) | 5.3<br>(3.0 to 7.7)   | 37.0<br>(24.0 to 50.0)   | 29.3<br>(16.6 to 42.0)  | 5.9<br>(3.3 to 8.5)    |
| Bihar           | 15.4<br>(10.7 to 20.1)                  | 8.1<br>(5.2 to 11.0)   | 4.4<br>(1.0 to 7.9)    | 28.1<br>(24.1 to 32.2) | 19.4<br>(16.2 to 22.7) | 4.7<br>(3.1 to 6.4)   | 52.6<br>(37.2 to 68.1)   | 44.9<br>(29.9 to 59.9)  | 6.5<br>(2.9 to 10.1)   |
| Madhya Pradesh  | 29.7<br>(24.4 to 35.0)                  | 16.7<br>(12.8 to 20.5) | 7.4<br>(4.6 to 10.2)   | 47.2<br>(39.2 to 55.3) | 34.7<br>(27.3 to 42.2) | 9.4<br>(6.6 to 12.3)  | 101.2<br>(72.9 to 129.5) | 80.0<br>(53.0 to 106.9) | 18.9<br>(10.4 to 27.4) |
| Odisha          | 44.1<br>(21.2 to 66.9)                  | 12.0<br>(7.9 to 16.1)  | 14.8<br>(-1.0 to 30.5) | 42.0<br>(32.2 to 51.9) | 21.0<br>(15.7 to 26.4) | 14.6<br>(6.8 to 22.4) | 79.6<br>(63.3 to 95.8)   | 57.7<br>(42.7 to 72.8)  | 20.2<br>(14.3 to 26.2) |
| Rajasthan       | 34.3<br>(25.6 to 43.1)                  | 21.6<br>(14.5 to 28.8) | 4.6<br>(2.5 to 6.7)    | 56.7<br>(45.9 to 67.5) | 37.0<br>(30.0 to 44.0) | 6.4<br>(3.5 to 9.3)   | 101.9<br>(88.6 to 115.2) | 75.4<br>(64.0 to 86.8)  | 25.2<br>(18.5 to 31.9) |
| Uttar Pradesh   | 18.6<br>(15.1 to 22.0)                  | 11.8<br>(9.5 to 14.2)  | 3.4<br>(1.2 to 5.6)    | 38.6<br>(32.0 to 45.2) | 27.7<br>(21.6 to 33.8) | 5.5<br>(4.1 to 6.9)   | 78.5<br>(65.5 to 91.4)   | 62.5<br>(50.8 to 74.2)  | 12.7<br>(8.6 to 16.7)  |
| Jammu & Kashmir | 34.3<br>(15.8 to 52.9)                  | 19.4<br>(4.6 to 34.1)  | 8.7<br>(-1.8 to 19.3)  | 48.5<br>(36.4 to 60.6) | 39.0<br>(28.0 to 50.0) | 6.3<br>(1.9 to 10.7)  | 68.5<br>(50.4 to 86.7)   | 55.9<br>(39.8 to 71.9)  | 11.2<br>(2.9 to 19.6)  |

(...continues)

(...continued)

| States         | Hospitalisation rates per 1000 (95% CI) |                          |                        |                           |                           |                        |                           |                           |                        |
|----------------|-----------------------------------------|--------------------------|------------------------|---------------------------|---------------------------|------------------------|---------------------------|---------------------------|------------------------|
|                | NSS 1995–1996                           |                          |                        | NSS 2004                  |                           |                        | NSS 2014                  |                           |                        |
|                | All diseases                            | NCDs                     | CDs                    | All diseases              | NCDs                      | CDs                    | All diseases              | NCDs                      | CDs                    |
| More developed | 70.9<br>(66.1 to 75.8)                  | 41.7<br>(37.7 to 45.8)   | 12.7<br>(10.8 to 14.6) | 104.6<br>(99.8 to 109.4)  | 74.6<br>(70.4 to 78.7)    | 17.1<br>(15.1 to 19.1) | 134.3<br>(128.0 to 140.7) | 109.7<br>(103.9 to 115.5) | 21.1<br>(18.8 to 23.5) |
| Andhra Pradesh | 47.0<br>(36.5 to 57.6)                  | 30.8<br>(21.7 to 40.0)   | 6.2<br>(3.2 to 9.2)    | 65.9<br>(57.2 to 74.5)    | 54.4<br>(46.3 to 62.5)    | 5.8<br>(3.6 to 8.0)    | 111.2<br>(96.4 to 126.0)  | 94.1<br>(80.6 to 107.6)   | 12.9<br>(8.1 to 17.7)  |
| Gujarat        | 45.9<br>(36.2 to 55.6)                  | 18.4<br>(13.9 to 22.9)   | 19.3<br>(11.3 to 27.3) | 102.5<br>(86.7 to 118.2)  | 64.6<br>(52.5 to 76.8)    | 27.3<br>(18.4 to 36.2) | 123.7<br>(105.8 to 141.7) | 98.0<br>(83.4 to 112.5)   | 24.9<br>(14.4 to 35.3) |
| Haryana        | 79.6<br>(57.0 to 102.1)                 | 51.5<br>(33.4 to 69.6)   | 20.9<br>(9.1 to 32.7)  | 81.8<br>(57.2 to 106.5)   | 61.0<br>(38.5 to 83.5)    | 13.7<br>(5.4 to 22.0)  | 89.2<br>(71.5 to 106.8)   | 75.3<br>(58.7 to 91.9)    | 13.1<br>(7.1 to 19.1)  |
| Karnataka      | 52.5<br>(37.8 to 67.2)                  | 30.5<br>(18.4 to 42.6)   | 8.0<br>(2.6 to 13.3)   | 80.4<br>(68.2 to 92.6)    | 54.0<br>(44.7 to 63.3)    | 10.5<br>(5.7 to 15.3)  | 110.3<br>(96.9 to 123.7)  | 89.2<br>(76.9 to 101.4)   | 19.8<br>(14.6 to 25.1) |
| Kerala         | 200.5<br>(175.8 to 225.1)               | 110.5<br>(94.2 to 128.6) | 39.0<br>(27.9 to 50.2) | 279.1<br>(251.7 to 306.5) | 190.5<br>(168.3 to 212.6) | 47.0<br>(34.9 to 59.0) | 281.3<br>(249.1 to 313.5) | 216.2<br>(189.5 to 243.0) | 51.5<br>(36.2 to 66.7) |
| Maharashtra    | 70.4<br>(60.3 to 80.5)                  | 42.9<br>(35.0 to 50.9)   | 10.9<br>(7.6 to 14.2)  | 96.6<br>(85.0 to 108.2)   | 76.0<br>(65.1 to 86.8)    | 11.1<br>(8.0 to 14.1)  | 119.9<br>(103.1 to 136.7) | 103.0<br>(86.5 to 119.4)  | 14.4<br>(11.1 to 17.7) |
| Punjab         | 45.6<br>(34.0 to 57.2)                  | 21.7<br>(14.0 to 29.3)   | 4.7<br>(1.7 to 7.7)    | 80.7<br>(63.2 to 98.2)    | 58.8<br>(43.7 to 73.8)    | 12.5<br>(5.1 to 19.8)  | 103.7<br>(80.0 to 127.5)  | 89.5<br>(66.6 to 112.5)   | 12.7<br>(6.8 to 18.6)  |
| Tamil Nadu     | 72.7<br>(52.7 to 92.7)                  | 52.3<br>(32.8 to 71.8)   | 7.7<br>(5.2 to 10.2)   | 105.6<br>(92.0 to 119.2)  | 71.9<br>(60.9 to 82.9)    | 23.1<br>(15.8 to 30.4) | 138.1<br>(118.5 to 157.7) | 115.3<br>(96.6 to 134.0)  | 22.1<br>(16.3 to 27.8) |
| West Bengal    | 41.5<br>(33.0 to 50.1)                  | 22.1<br>(17.4 to 26.9)   | 8.0<br>(2.3 to 13.7)   | 68.5<br>(59.5 to 77.4)    | 46.7<br>(38.8 to 54.6)    | 11.5<br>(8.4 to 14.6)  | 109.4<br>(98.1 to 120.7)  | 86.3<br>(76.0 to 96.6)    | 18.7<br>(14.3 to 23.1) |
| India          | 49.7<br>(46.8 to 52.6)                  | 28.7<br>(26.5 to 31.0)   | 9.5<br>(8.2 to 10.8)   | 76.4<br>(73.4 to 79.4)    | 54.0<br>(51.4 to 56.5)    | 12.7<br>(11.5 to 13.9) | 109.9<br>(105.2 to 114.5) | 88.5<br>(84.2 to 92.8)    | 18.4<br>(16.8 to 20.1) |

NSS, National Sample Survey; CI, Confidence intervals.
