# Supplementary material for: Hospitalisation trends in India from serial cross-sectional nationwide surveys: 1995 to 2014
Source: PubMed Central journal article supplement (PMC5770834; doi:10.1136/bmjopen-2016-014188), 2017-12-19
Supplement: bmjopen-2016-014188supp004.pdf [file bmjopen-2016-014188supp004.pdf]

**Table S4** Hospitalisation rates per 1000 (95% CI) in public hospitals among the older population in the major states in NSS 1995–1996, NSS 2004 and NSS 2014, India

| States          | Hospitalisation rates per 1000 (95% CI) in public hospitals |                         |                        |                        |                        |                        |                        |                        |                        |
|-----------------|-------------------------------------------------------------|-------------------------|------------------------|------------------------|------------------------|------------------------|------------------------|------------------------|------------------------|
|                 | NSS 1995–1996                                               |                         |                        | NSS 2004               |                        |                        | NSS 2014               |                        |                        |
|                 | Non-poor                                                    | Poor                    | Total                  | Non-poor               | Poor                   | Total                  | Non-poor               | Poor                   | Total                  |
| Less developed  | 53.3<br>(45.6 to 60.8)                                      | 64.8<br>(56.0 to 72.7)  | 57.1<br>(51.3 to 62.6) | 38.7<br>(33.6 to 44.2) | 59.5<br>(54.9 to 63.9) | 48.9<br>(45.0 to 52.9) | 36.0<br>(30.4 to 41.9) | 55.0<br>(48.9 to 60.9) | 45.2<br>(40.9 to 49.6) |
| Assam           | 78.8<br>(61.2 to 89.8)                                      | 67.2<br>(33.3 to 89.4)  | 76.0<br>(60.1 to 86.9) | 47.7<br>(25.4 to 70.9) | 83.8<br>(66.7 to 93.0) | 64.4<br>(44.9 to 80.1) | 78.3<br>(65.3 to 87.4) | 86.6<br>(72.0 to 94.2) | 82.3<br>(72.3 to 89.2) |
| Bihar           | 35.5<br>(19.6 to 55.4)                                      | 22.9<br>(9.1 to 46.7)   | 31.3<br>(18.4 to 48.0) | 14.3<br>(9.5 to 20.9)  | 27.5<br>(19.2 to 37.7) | 21.3<br>(16.0 to 27.6) | 20.5<br>(11.9 to 33.0) | 42.8<br>(32.6 to 53.6) | 28.8<br>(20.3 to 39.1) |
| Madhya Pradesh  | 43.6<br>(33.3 to 54.4)                                      | 72.0<br>(56.5 to 83.6)  | 51.4<br>(42.2 to 60.5) | 35.1<br>(26.8 to 44.4) | 67.0<br>(53.1 to 78.4) | 51.6<br>(43.1 to 60.0) | 24.5<br>(14.8 to 37.7) | 48.1<br>(31.3 to 65.3) | 37.2<br>(26.2 to 49.8) |
| Odisha          | 92.6<br>(81.6 to 97.3)                                      | 93.4<br>(84.5 to 97.3)  | 92.9<br>(85.5 to 96.6) | 74.6<br>(61.2 to 84.6) | 86.9<br>(76.3 to 93.2) | 81.1<br>(72.6 to 87.5) | 71.0<br>(58.8 to 80.8) | 85.8<br>(76.9 to 91.6) | 79.2<br>(72.5 to 84.7) |
| Rajasthan       | 60.7<br>(44.1 to 75.1)                                      | 44.7<br>(23.7 to 67.7)  | 55.6<br>(42.1 to 68.4) | 52.7<br>(39.0 to 66.0) | 70.9<br>(60.3 to 79.7) | 59.9<br>(50.0 to 69.1) | 48.8<br>(40.5 to 57.2) | 66.5<br>(57.2 to 74.7) | 58.9<br>(52.4 to 65.0) |
| Uttar Pradesh   | 30.9<br>(22.8 to 40.4)                                      | 54.2<br>(38.2 to 69.4)  | 38.6<br>(30.2 to 47.8) | 24.7<br>(17.4 to 33.9) | 44.7<br>(36.7 to 53.0) | 34.3<br>(27.7 to 41.5) | 26.8<br>(18.5 to 37.0) | 30.8<br>(23.0 to 39.9) | 28.4<br>(22.4 to 35.3) |
| Jammu & Kashmir | 94.5<br>(82.7 to 98.4)                                      | 99.6<br>(97.1 to 100.0) | 97.7<br>(93.6 to 99.2) | 92.6<br>(84.6 to 96.6) | 85.9<br>(71.3 to 93.8) | 89.1<br>(80.7 to 94.0) | 87.1<br>(73.9 to 94.1) | 94.9<br>(86.7 to 98.1) | 92.6<br>(86.2 to 96.1) |

(...continues)

(...continued)

| States         | Hospitalisation rates per 1000 (95% CI) in public hospitals |                        |                        |                        |                        |                        |                        |                        |                        |
|----------------|-------------------------------------------------------------|------------------------|------------------------|------------------------|------------------------|------------------------|------------------------|------------------------|------------------------|
|                | NSS 1995–1996                                               |                        |                        | NSS 2004               |                        |                        | NSS 2014               |                        |                        |
|                | Non-poor                                                    | Poor                   | Total                  | Non-poor               | Poor                   | Total                  | Non-poor               | Poor                   | Total                  |
| More developed | 27.2<br>(23.6 to 31.1)                                      | 52.4<br>(46.9 to 57.8) | 38.5<br>(35.0 to 42.1) | 28.1<br>(25.0 to 31.3) | 42.6<br>(39.4 to 45.8) | 36.1<br>(33.9 to 38.4) | 20.7<br>(18.0 to 23.6) | 41.1<br>(38.2 to 44.1) | 31.6<br>(29.5 to 33.8) |
| Andhra Pradesh | 16.3<br>(10.0 to 25.5)                                      | 42.2<br>(27.9 to 57.9) | 24.6<br>(17.6 to 33.2) | 24.1<br>(15.9 to 34.7) | 38.8<br>(30.8 to 47.4) | 32.0<br>(26.2 to 38.5) | 14.6<br>(8.7 to 23.3)  | 29.9<br>(22.8 to 38.0) | 22.6<br>(17.7 to 28.3) |
| Gujarat        | 27.2<br>(15.9 to 42.5)                                      | 64.9<br>(47.1 to 79.3) | 40.6<br>(30.0 to 52.2) | 17.7<br>(11.2 to 26.8) | 33.6<br>(24.4 to 44.3) | 25.4<br>(19.5 to 32.3) | 16.7<br>(10.3 to 26.0) | 33.6<br>(26.0 to 42.0) | 24.9<br>(19.5 to 31.2) |
| Haryana        | 39.8<br>(24.7 to 57.0)                                      | 25.2<br>(10.8 to 48.4) | 33.3<br>(22.0 to 46.8) | 20.8<br>(11.5 to 34.6) | 18.2<br>(9.2 to 33.0)  | 19.6<br>(12.5 to 29.2) | 6.9<br>(3.8 to 12.4)   | 52.9<br>(39.0 to 66.3) | 29.7<br>(21.3 to 39.8) |
| Karnataka      | 33.0<br>(19.6 to 49.9)                                      | 46.3<br>(27.5 to 66.3) | 35.1<br>(23.1 to 49.5) | 20.8<br>(12.9 to 31.6) | 51.4<br>(40.6 to 62.0) | 35.4<br>(28.3 to 43.2) | 26.5<br>(16.3 to 40.1) | 28.5<br>(22.4 to 35.5) | 27.8<br>(22.1 to 34.2) |
| Kerala         | 21.1<br>(14.4 to 29.9)                                      | 55.1<br>(47.2 to 62.8) | 42.0<br>(35.9 to 48.4) | 26.9<br>(20.2 to 34.9) | 41.0<br>(35.0 to 47.3) | 35.6<br>(31.0 to 40.5) | 20.3<br>(14.4 to 27.8) | 49.5<br>(42.3 to 56.7) | 33.8<br>(28.8 to 39.3) |
| Maharashtra    | 15.2<br>(9.9-22.8)                                          | 35.8<br>(26.3 to 46.5) | 25.1<br>(19.4 to 31.9) | 22.7<br>(15.6 to 31.7) | 36.2<br>(29.0 to 44.1) | 30.7<br>(25.4 to 36.5) | 9.3<br>(6.2 to 13.7)   | 29.7<br>(22.3 to 38.2) | 20.5<br>(15.7 to 26.3) |
| Punjab         | 35.8<br>(22.9 to 51.1)                                      | 41.8<br>(22.7 to 63.7) | 38.3<br>(27.0 to 51.0) | 32.4<br>(20.0 to 47.9) | 25.2<br>(14.4 to 40.2) | 29.4<br>(20.4 to 40.3) | 22.3<br>(7.5 to 50.6)  | 24.8<br>(16.1 to 36.2) | 23.6<br>(13.8 to 37.3) |
| Tamil Nadu     | 21.5<br>(14.1 to 31.5)                                      | 69.4<br>(49.7 to 83.9) | 43.2<br>(29.3 to 58.2) | 16.7<br>(11.6 to 23.3) | 43.5<br>(34.8-52.6)    | 33.6<br>(27.7 to 40.1) | 13.6<br>(9.2 to 19.7)  | 40.7<br>(32.9 to 49.1) | 30.8<br>(25.7 to 36.4) |
| West Bengal    | 62.3<br>(51.5-72.0)                                         | 83.0<br>(65.1 to 92.7) | 69.0<br>(59.6 to 77.1) | 60.2<br>(51.6 to 68.3) | 82.1<br>(75.0 to 87.5) | 69.0<br>(63.2 to 74.2) | 49.8<br>(43.2 to 56.4) | 72.1<br>(63.4 to 79.4) | 61.0<br>(55.9 to 65.9) |
| India          | 34.1<br>(30.4 to 37.9)                                      | 54.6<br>(49.9 to 59.2) | 42.7<br>(39.7 to 45.8) | 30.9<br>(28.3 to 33.6) | 46.3<br>(43.6 to 49.1) | 39.2<br>(37.3 to 41.2) | 25.8<br>(23.2 to 28.4) | 45.2<br>(42.5 to 47.9) | 35.9<br>(33.9 to 37.8) |

NSS, National Sample Survey; CI, Confidence intervals.
